# Supplementary material for: Use of a systems engineering framework to assess perceptions and practices about antimicrobial resistance of workers on large dairy farms in Wisconsin
Source: bioRxiv or medRxiv preprint supplement (doi:10.1101/2020.10.28.20221747), 2020-11-03
Supplement: Supplementary file [file media-1.pdf]

**Direct Observations Checklist Instrument**

Observer Name: \_\_\_\_\_ Date: \_\_\_\_ / \_\_\_\_ / \_\_\_\_\_ Start Time: \_\_\_\_ : \_\_\_\_ am / pm

Farm ID: \_\_\_\_\_ End Time: \_\_\_\_ : \_\_\_\_ am / pm

|                                                                                                                                                                                                     |                                                                                                    |
|-----------------------------------------------------------------------------------------------------------------------------------------------------------------------------------------------------|----------------------------------------------------------------------------------------------------|
| <b>Zone: Entry/ Parking</b> <input type="checkbox"/> Not Applicable                                                                                                                                 |                                                                                                    |
| Limiting non-essential traffic on farm <sup>1</sup>                                                                                                                                                 | <input type="checkbox"/> Yes <input type="checkbox"/> No                                           |
| Clearly designated visitor entry                                                                                                                                                                    | <input type="checkbox"/> Yes <input type="checkbox"/> No                                           |
| Visitor sign-in                                                                                                                                                                                     | <input type="checkbox"/> Yes <input type="checkbox"/> No                                           |
| Disposable PPE including boot covers (or boot wash) provided                                                                                                                                        | <input type="checkbox"/> Yes <input type="checkbox"/> No                                           |
| <b>Zone: Breakroom/ Kitchen</b> <input type="checkbox"/> Not Applicable                                                                                                                             |                                                                                                    |
| Boot cleaning station nearby                                                                                                                                                                        | <input type="checkbox"/> Yes <input type="checkbox"/> No                                           |
| Refrigerators used for food storage only                                                                                                                                                            | <input type="checkbox"/> Yes <input type="checkbox"/> No                                           |
| Clean tables for eating /food prep                                                                                                                                                                  | <input type="checkbox"/> Yes <input type="checkbox"/> No                                           |
| Sinks with soap and drying towels or blowers                                                                                                                                                        | <input type="checkbox"/> Yes <input type="checkbox"/> No                                           |
| Microbiology or Nutrition lab present                                                                                                                                                               | <input type="checkbox"/> Yes <input type="checkbox"/> No                                           |
| Signage reminding workers about proper hand hygiene                                                                                                                                                 | <input type="checkbox"/> None <input type="checkbox"/> English<br><input type="checkbox"/> Spanish |
| Notes:                                                                                                                                                                                              |                                                                                                    |
| <b>Zone: Bathroom Facilities</b> <input type="checkbox"/> Not Applicable                                                                                                                            |                                                                                                    |
| Boot wash nearby                                                                                                                                                                                    | <input type="checkbox"/> Yes <input type="checkbox"/> No                                           |
| Shower present                                                                                                                                                                                      | <input type="checkbox"/> Yes <input type="checkbox"/> No                                           |
| What type(s) of hand hygiene are provided:<br><input type="checkbox"/> Hand Sanitizer <input type="checkbox"/> Soap/ Water <input type="checkbox"/> Paper towels <input type="checkbox"/> Air dryer |                                                                                                    |
| Are hand hygiene instructions provided?<br><input type="checkbox"/> English <input type="checkbox"/> Spanish <input type="checkbox"/> None                                                          |                                                                                                    |
| Notes:                                                                                                                                                                                              |                                                                                                    |

|                                                                                                                                                                                                          |                                                                                                       |
|----------------------------------------------------------------------------------------------------------------------------------------------------------------------------------------------------------|-------------------------------------------------------------------------------------------------------|
| <b>Zone: Locker Facilities.</b> <input type="checkbox"/> Not Applicable                                                                                                                                  |                                                                                                       |
| Boot wash station nearby                                                                                                                                                                                 | <input type="checkbox"/> Yes <input type="checkbox"/> No                                              |
| Access to shower facilities with soap                                                                                                                                                                    | <input type="checkbox"/> Yes <input type="checkbox"/> No                                              |
| Notes:                                                                                                                                                                                                   |                                                                                                       |
| <b>Zone: Laundry</b> <input type="checkbox"/> Not Applicable                                                                                                                                             |                                                                                                       |
| Instructions on proper use                                                                                                                                                                               | <input type="checkbox"/> None<br><input type="checkbox"/> English<br><input type="checkbox"/> Spanish |
| Instructions to use high heat and tumble dry                                                                                                                                                             | <input type="checkbox"/> Yes <input type="checkbox"/> No                                              |
| Cleanliness of the washing machine<br><input type="checkbox"/> Clean <input type="checkbox"/> Mold/mildew present <input type="checkbox"/> Noticeable malodor<br><input type="checkbox"/> Visibly soiled |                                                                                                       |
| Does the farm use an off-site service for laundry?<br><input type="checkbox"/> Yes <input type="checkbox"/> No <input type="checkbox"/> Partial: _____                                                   |                                                                                                       |
| What is laundry room used for?                                                                                                                                                                           | <input type="checkbox"/> Clothing<br><input type="checkbox"/> Milking Towels                          |
| Washing machine operational                                                                                                                                                                              | <input type="checkbox"/> Yes <input type="checkbox"/> No                                              |
| Dryer operational                                                                                                                                                                                        | <input type="checkbox"/> Yes <input type="checkbox"/> No                                              |
| Are washer and/or dryer commercial/industrial or residential type                                                                                                                                        | <input type="checkbox"/> Commercial<br><input type="checkbox"/> Residential                           |
| Where are the laundry facilities located?                                                                                                                                                                |                                                                                                       |
| Notes:                                                                                                                                                                                                   |                                                                                                       |

**Zone: Milk Room/Production**

**Zone: Adult Lactating Cows**  Not Applicable

|                                                                                                                                                                                                     |                                                                                                                    |
|-----------------------------------------------------------------------------------------------------------------------------------------------------------------------------------------------------|--------------------------------------------------------------------------------------------------------------------|
| Easily accessible gloves                                                                                                                                                                            | <input type="checkbox"/> Yes <input type="checkbox"/> No                                                           |
| Are milking technicians wearing gloves                                                                                                                                                              | <input type="checkbox"/> Yes <input type="checkbox"/> No                                                           |
| Are milking technicians wearing plastic aprons                                                                                                                                                      | <input type="checkbox"/> Yes <input type="checkbox"/> No                                                           |
| Are milking technicians wearing coveralls                                                                                                                                                           | <input type="checkbox"/> Yes <input type="checkbox"/> No                                                           |
| Are milking technicians wearing safety glasses                                                                                                                                                      | <input type="checkbox"/> Yes <input type="checkbox"/> No                                                           |
| Do milking technicians have arm protection                                                                                                                                                          | <input type="checkbox"/> Yes <input type="checkbox"/> No                                                           |
| Cleanliness of bulk tank area<br>Signage designating clean area<br><input type="checkbox"/> Yes <input type="checkbox"/> No                                                                         | <input type="checkbox"/> Clean<br><input type="checkbox"/> Some soiling<br><input type="checkbox"/> Visibly soiled |
| Eye wash station                                                                                                                                                                                    | <input type="checkbox"/> Yes <input type="checkbox"/> No                                                           |
| Are soiled PPE garments changed prior to changing milking activities                                                                                                                                | <input type="checkbox"/> Yes <input type="checkbox"/> No                                                           |
| Cloth towel or disposable wipes?                                                                                                                                                                    | <input type="checkbox"/> Cloth towels<br><input type="checkbox"/> Disposable wipes                                 |
| What type(s) of hand hygiene are provided:<br><input type="checkbox"/> Hand Sanitizer <input type="checkbox"/> Soap/ Water <input type="checkbox"/> Paper towels <input type="checkbox"/> Air dryer |                                                                                                                    |
| Are hand hygiene instructions provided?<br><input type="checkbox"/> English <input type="checkbox"/> Spanish <input type="checkbox"/> None                                                          |                                                                                                                    |
| Boot cleaning station nearby                                                                                                                                                                        | <input type="checkbox"/> Yes <input type="checkbox"/> No                                                           |
| Notes on milking production:                                                                                                                                                                        |                                                                                                                    |
| <b>Zone: Medicine Storage</b> <input type="checkbox"/> Not Applicable                                                                                                                               |                                                                                                                    |
| Locked entry                                                                                                                                                                                        | <input type="checkbox"/> Yes <input type="checkbox"/> No                                                           |
| Controlled access                                                                                                                                                                                   | <input type="checkbox"/> Yes <input type="checkbox"/> No                                                           |
| Gloves/hand hygiene present                                                                                                                                                                         | <input type="checkbox"/> Yes <input type="checkbox"/> No                                                           |
| Plastic/disposable obstetrical sleeves available                                                                                                                                                    | <input type="checkbox"/> Yes <input type="checkbox"/> No                                                           |
| Notes:                                                                                                                                                                                              |                                                                                                                    |

|                                                                                                                                                                                                                                                                                   |                                                          |
|-----------------------------------------------------------------------------------------------------------------------------------------------------------------------------------------------------------------------------------------------------------------------------------|----------------------------------------------------------|
| Storage for equipment used only around healthy lactating cows                                                                                                                                                                                                                     | <input type="checkbox"/> Yes <input type="checkbox"/> No |
| Notes:                                                                                                                                                                                                                                                                            |                                                          |
| <b>Zone: Sick Cow Pen/ Hospital/ Isolation</b> <input type="checkbox"/> Not Applicable                                                                                                                                                                                            |                                                          |
| Boot wash station or disposable boot covers                                                                                                                                                                                                                                       | <input type="checkbox"/> Yes <input type="checkbox"/> No |
| Easily accessible gloves                                                                                                                                                                                                                                                          | <input type="checkbox"/> Yes <input type="checkbox"/> No |
| Are workers either able to change their clothing or provided with protective clothing?<br><input type="checkbox"/> Yes, changing facility <input type="checkbox"/> Yes, coveralls provided or plastic aprons<br><input type="checkbox"/> No <input type="checkbox"/> Other: _____ |                                                          |
| Are workers wearing PPE?<br><input type="checkbox"/> Gloves <input type="checkbox"/> Boot Covers <input type="checkbox"/> Coveralls or Aprons <input type="checkbox"/> No <input type="checkbox"/> N/A<br><input type="checkbox"/> Other: _____                                   |                                                          |
| What type(s) of hand hygiene are provided:<br><input type="checkbox"/> Hand Sanitizer <input type="checkbox"/> Soap/ Water <input type="checkbox"/> Paper towels <input type="checkbox"/> Air dryer <input type="checkbox"/> No                                                   |                                                          |
| Are hand hygiene instructions provided?<br><input type="checkbox"/> English <input type="checkbox"/> Spanish <input type="checkbox"/> None                                                                                                                                        |                                                          |
| Notes:                                                                                                                                                                                                                                                                            |                                                          |
| <b>Zone: Calving Pen/Maternity (Cont. next page)</b> <input type="checkbox"/> Not Applicable                                                                                                                                                                                      |                                                          |
| Boot wash station nearby                                                                                                                                                                                                                                                          | <input type="checkbox"/> Yes <input type="checkbox"/> No |
| Easily accessible gloves                                                                                                                                                                                                                                                          | <input type="checkbox"/> Yes <input type="checkbox"/> No |
| Access to hand hygiene                                                                                                                                                                                                                                                            | <input type="checkbox"/> Yes <input type="checkbox"/> No |
| Are workers wearing PPE                                                                                                                                                                                                                                                           | <input type="checkbox"/> Yes <input type="checkbox"/> No |
| What type(s) of hand hygiene are provided:<br><input type="checkbox"/> Hand Sanitizer <input type="checkbox"/> Soap and Water <input type="checkbox"/> Paper towels<br><input type="checkbox"/> Air dryer                                                                         |                                                          |

|                                                                                                                                                                                                                                                     |                                                          |                                                                                                                                                                                                                                                                                                     |                                                          |
|-----------------------------------------------------------------------------------------------------------------------------------------------------------------------------------------------------------------------------------------------------|----------------------------------------------------------|-----------------------------------------------------------------------------------------------------------------------------------------------------------------------------------------------------------------------------------------------------------------------------------------------------|----------------------------------------------------------|
| Are hand hygiene instructions provided?<br><input type="checkbox"/> English <input type="checkbox"/> Spanish <input type="checkbox"/> None                                                                                                          |                                                          | How are carcasses disposed of?<br><input type="checkbox"/> Disposal on site <input type="checkbox"/> Licensed Collection Company<br><b>If on site:</b> <input type="checkbox"/> Burial <input type="checkbox"/> Incineration <input type="checkbox"/> Composting <input type="checkbox"/> Rendering |                                                          |
| Are workers wearing PPE?<br><input type="checkbox"/> Gloves <input type="checkbox"/> Boot Covers <input type="checkbox"/> Coveralls or Aprons <input type="checkbox"/> No <input type="checkbox"/> N/A<br><br><input type="checkbox"/> Other: _____ |                                                          | Protective clothing provided<br><input type="checkbox"/> Coveralls <input type="checkbox"/> Aprons <input type="checkbox"/> Gloves <input type="checkbox"/> Boot covers <input type="checkbox"/> None <input type="checkbox"/> NA                                                                   |                                                          |
| Notes:                                                                                                                                                                                                                                              |                                                          | Are workers required to change clothing prior to handling other animals                                                                                                                                                                                                                             | <input type="checkbox"/> Yes <input type="checkbox"/> No |
| Notes:                                                                                                                                                                                                                                              |                                                          | Are there signs limiting who and what vehicles can be in the zone?                                                                                                                                                                                                                                  | <input type="checkbox"/> Yes <input type="checkbox"/> No |
| Notes:                                                                                                                                                                                                                                              |                                                          | Is there a place to clean trucks and tires                                                                                                                                                                                                                                                          | <input type="checkbox"/> Yes <input type="checkbox"/> No |
| <b>Zone: Baby Calf Hutches/ Housing</b> <input type="checkbox"/> Not Applicable                                                                                                                                                                     |                                                          | What type(s) of hand hygiene are provided:<br><input type="checkbox"/> Hand Sanitizer <input type="checkbox"/> Soap/ Water <input type="checkbox"/> Paper towels <input type="checkbox"/> Air dryer                                                                                                 |                                                          |
| Boot wash station or disposable boot covers                                                                                                                                                                                                         | <input type="checkbox"/> Yes <input type="checkbox"/> No | Are hand hygiene instructions provided?<br><input type="checkbox"/> English <input type="checkbox"/> Spanish <input type="checkbox"/> None                                                                                                                                                          |                                                          |
| Easily accessible gloves                                                                                                                                                                                                                            | <input type="checkbox"/> Yes <input type="checkbox"/> No | Notes:                                                                                                                                                                                                                                                                                              |                                                          |
| Are workers wearing PPE?<br><input type="checkbox"/> Gloves <input type="checkbox"/> Boots or Covers <input type="checkbox"/> Coveralls or Aprons <input type="checkbox"/> No<br><br><input type="checkbox"/> Other: _____                          |                                                          | <b>Zone: Dry Cows</b> <input type="checkbox"/> Not Applicable                                                                                                                                                                                                                                       |                                                          |
| What type(s) of hand hygiene are provided:<br><input type="checkbox"/> Hand Sanitizer <input type="checkbox"/> Soap/ Water <input type="checkbox"/> Paper towels <input type="checkbox"/> Air dryer                                                 |                                                          | Are gloves easily accessible                                                                                                                                                                                                                                                                        | <input type="checkbox"/> Yes <input type="checkbox"/> No |
| Are hand hygiene instructions provided?<br><input type="checkbox"/> English <input type="checkbox"/> Spanish <input type="checkbox"/> None                                                                                                          |                                                          | Boot wash station or disposable boot covers                                                                                                                                                                                                                                                         | <input type="checkbox"/> Yes <input type="checkbox"/> No |
| Restricted access to calf housing?                                                                                                                                                                                                                  | <input type="checkbox"/> Yes <input type="checkbox"/> No | Are workers using gloves                                                                                                                                                                                                                                                                            | <input type="checkbox"/> Yes <input type="checkbox"/> No |
| Equipment storage only for calves (e.g. shovels, buckets, halters, etc.)                                                                                                                                                                            | <input type="checkbox"/> Yes <input type="checkbox"/> No | What type(s) of hand hygiene are nearby:<br><input type="checkbox"/> Hand Sanitizer <input type="checkbox"/> Soap/ Water <input type="checkbox"/> Paper towels <input type="checkbox"/> Air dryer                                                                                                   |                                                          |
| Notes:                                                                                                                                                                                                                                              |                                                          | Are hand hygiene instructions provided?<br><input type="checkbox"/> English <input type="checkbox"/> Spanish <input type="checkbox"/> Both                                                                                                                                                          |                                                          |
| Notes:                                                                                                                                                                                                                                              |                                                          | Notes                                                                                                                                                                                                                                                                                               |                                                          |

|                                                                          |                                                          |               |  |
|--------------------------------------------------------------------------|----------------------------------------------------------|---------------|--|
| <b>General Biosecurity Observations:</b>                                 |                                                          | <b>Notes:</b> |  |
| Do workers change or launder clothes or shoes prior to leaving the farm? | <input type="checkbox"/> Yes <input type="checkbox"/> No |               |  |

|                                                                                                                                                                                                                                                                                                                                                                                                             |                                                          |  |
|-------------------------------------------------------------------------------------------------------------------------------------------------------------------------------------------------------------------------------------------------------------------------------------------------------------------------------------------------------------------------------------------------------------|----------------------------------------------------------|--|
| Are coveralls provided for workers?                                                                                                                                                                                                                                                                                                                                                                         | <input type="checkbox"/> Yes <input type="checkbox"/> No |  |
| Are boots or shoe coverings provided for workers?                                                                                                                                                                                                                                                                                                                                                           | <input type="checkbox"/> Yes <input type="checkbox"/> No |  |
| Where do workers typically eat?                                                                                                                                                                                                                                                                                                                                                                             |                                                          |  |
| Are personal vehicles able or allowed to be driven where animals may walk or be transported?                                                                                                                                                                                                                                                                                                                | <input type="checkbox"/> Yes <input type="checkbox"/> No |  |
| How often are employees encouraged to change PPE?                                                                                                                                                                                                                                                                                                                                                           |                                                          |  |
| Obstetrical chains?                                                                                                                                                                                                                                                                                                                                                                                         |                                                          |  |
| Hot water heater heats to temp and supplies sufficient hot water                                                                                                                                                                                                                                                                                                                                            |                                                          |  |
| Which of the following disinfectants, if any, did you see on the farm?                                                                                                                                                                                                                                                                                                                                      |                                                          |  |
| <input type="checkbox"/> Bleach/ chlorine based (Clorox) <input type="checkbox"/> Chlorhexidine (Nolvasan) <input type="checkbox"/> Iodophors (Betadine/ Weladol) <input type="checkbox"/> Oxidizers (Virkon/ Oxy-Sept 333)<br><input type="checkbox"/> Ammonium (Roccal D Plus) <input type="checkbox"/> Phenolic (Pine-Sol, One Stroke, Osyl) <input type="checkbox"/> No <input type="checkbox"/> Other: |                                                          |  |

|                           |
|---------------------------|
| <b>Other Observations</b> |
|                           |
